# Supplementary material for: A green chemistry-based classification model for the synthesis of silver nanoparticles
Source: Royal Society of Chemistry journal article supplement (doi:10.1039/c4gc02088j), 2015-01-01
Supplement: c4gc02088j1.pdf [file c4gc02088j1.pdf]

Electronic Supplementary Information (ESI)

## A green chemistry-based classification model for the synthesis of silver nanoparticles

Marco Cinelli<sup>1,\*</sup>, Stuart R. Coles<sup>1</sup>, Mallikarjuna N. Nadagouda<sup>2</sup>, Jerzy Błaszczyński<sup>3</sup>,  
Roman Słowiński<sup>3,4</sup>, Rajender S. Varma<sup>5,\*</sup>, Kerry Kirwan<sup>1,\*</sup>

<sup>1</sup> WMG, International Manufacturing Centre, University of Warwick, University Road,  
Coventry, CV4 7AL, UK

<sup>2</sup> ORD, NRMRL, WSWRD, TTEB, U.S. Environmental Protection Agency, Cincinnati, Ohio,  
45268, United States

<sup>3</sup> Institute of Computing Science, Poznań University of Technology, 60-965 Poznań,  
Poland

<sup>4</sup> Systems Research Institute, Polish Academy of Sciences, 01-447 Warsaw, Poland

<sup>5</sup> Sustainable Technology Division, National Risk Management Research Laboratory, U.S.  
Environmental Protection Agency, Cincinnati, Ohio, 45268, United States

\* Corresponding authors:

(M. C.): e-mail: [m.cinelli@warwick.ac.uk](mailto:m.cinelli@warwick.ac.uk); Phone: +44 (0) 24 7657 2540

(R. S. V.): e-mail: [Varma.rajender@epa.gov](mailto:Varma.rajender@epa.gov); Phone: +1 (513) 487-2701

(K. K.): email: [kerry.kirwan@warwick.ac.uk](mailto:kerry.kirwan@warwick.ac.uk); Phone: +44 (0) 024 765 28444

Journal: Green Chemistry

Number of Pages: 24

Number of Tables: 1

Number of Figures: 2

### Contents

- Rationale for preference order of criteria values from Table 1
- Table S1: Dataset of production protocols for silver nanoparticles
- Additional methodological considerations
- Basic notions of Dominance-based Rough Set Approach (DRSA)
- Decision rules from DRSA
- New classification scheme based on DRSA to classify new or existing protocols
- Figure S1: Green chemistry-based classification model - At least rules
- Figure S1: Green chemistry-based classification model - At most rules
- Extended calculations of scores for test protocol  $t_1$  and  $t_3$  with new classification scheme following formulas described in Section 2.2
- Excel spreadsheet: Dataset of production protocols for silver nanoparticles

## Rationale for preference order of criteria values from Table 1

### *Choice of preference order for values of reducing agent, capping agent and solvent criteria*

Renewable materials are preferred options not only for their non-exhaustible nature, but also because they are sources acknowledged as being benign, recurrently used for medicinal or even for feeding purposes. The biodegradable polymer category includes polymers that have to be synthesized but are biodegradable and not hazardous. On the other hand the synthetic category includes chemicals that are usually hazardous and require dedicated synthesis processes. Furthermore, some materials can perform both the role of reducing and capping agent <sup>1</sup>. In this case they allow implementing multifunctionality that is a key requirement from a green chemistry perspective.

### *Choice of preference order for values of equipment type criterion*

Several bottom-up approaches are available starting from very simple equipment such as a stirring plate, up to a laboratory microwave oven and oil baths.

Static conditions do not imply any use of energy, which are ideal from a green chemistry perspective.

Stirring systems are placed as the next best choice as they are the processes that require the lowest amounts of energy to sustain the reaction (in the range of watts fractions depending on the rpm rate) <sup>2</sup>. Furthermore they are very simple pieces of equipment with higher degree of control over the process and safer reactions conditions.

Microwave (MW) was introduced as a specific class as it is a widely recognized alternative source of energy for the rapid synthesis of well-defined nanosized particles. The main advantages of MW heating compared to conventional heating techniques are <sup>3-9</sup>:

- Reactions kinetics increase by 1-2 orders of magnitude;
- Possibility of producing better defined (uniform) and smaller particles;
- Enhanced kinetics of crystallization;
- Reduction in waste production (as wall effects can cause crusting and degradation in conventionally-heated reactors that increases impurities and consequently byproducts).

The reduction in reactions time and faster crystallization kinetics can lead to energy savings compared to conventional techniques. This consideration coupled with the fact that MW-assisted process allows reduction in unwanted byproducts from the reactions justifies the location in a preferred position for this method compared to the conventional ones (oil baths).

The energy consumption of microwaves has been studied in the literature and it has been shown that the systems that employ MW heating in sealed vessels at small scales (up to 50 mL) use less energy than conventional techniques under comparable conditions. This consideration derives from the fact that they allow obtaining the same amount of product in a much shorter period of time and consequently with less energy consumption <sup>8, 10-12</sup>. However, their actual energy efficiency is under debate and so we do not assume higher energy efficiency for MW compared to conventional techniques (see for details <sup>8, 10-14</sup>). Nonetheless the use of MW technique with open vessels at laboratory scales does not imply a better energetic performance compared to conventional heating and so this option is placed in a lower preferred class <sup>10</sup>, though still accounting for the reduction in byproducts, simplicity of the process and inherent safety <sup>15</sup> compared to conventional approaches. There can also be cases with missing information about the type of equipment used, which is considered as a worst case due to the uncertainty of the information.

## References for preference order of criteria values

1. M. N. Nadagouda and R. S. Varma, *Green Chemistry*, 2008, 10, 859-862.

2. N. K. Gill, M. Appleton, F. Baganz and G. J. Lye, *Biotechnology and Bioengineering*, 2008, 100, 1144-1155.
3. M. B. Gawande, S. N. Shelke, R. Zboril and R. S. Varma, *Accounts of Chemical Research*, 2014, 47, 1338-1348.
4. R. S. Varma, *Green Chemistry*, 2014, 16, 2027-2041.
5. R. S. Varma, in *Innovations in Green Chemistry and Green Engineering*, eds. P. T. Anastas and J. B. Zimmerman, Springer New York, 2013, DOI: 10.1007/978-1-4614-5817-3\_5, ch. 5, pp. 115-156.
6. A. Nirmala Grace and K. Pandian, *Materials Chemistry and Physics*, 2007, 104, 191-198.
7. S. Komarneni, D. Li, B. Newalkar, H. Katsuki and A. S. Bhalla, *Langmuir*, 2002, 18, 5959-5962.
8. J. D. Moseley and C. O. Kappe, *Green Chemistry*, 2011, 13, 794-806.
9. M. Tsuji, M. Hashimoto, Y. Nishizawa, M. Kubokawa and T. Tsuji, *Chemistry – A European Journal*, 2005, 11, 440-452.
10. T. Razzaq and C. O. Kappe, *ChemSusChem*, 2008, 1, 123-132.
11. M. J. Gronnow, R. J. White, J. H. Clark and D. J. Macquarrie, *Organic Process Research & Development*, 2007, 11, 293-293.
12. M. J. Gronnow, R. J. White, J. H. Clark and D. J. Macquarrie, *Organic Process Research & Development*, 2005, 9, 516-518.
13. H. Cho, F. Torok and B. Torok, *Green Chemistry*, 2014, 16, 3623-3634.
14. J. D. Moseley and E. K. Woodman, *Energy & Fuels*, 2009, 23, 5438-5447.
15. J. M. Patete, X. Peng, C. Koenigsmann, Y. Xu, B. Karn and S. S. Wong, *Green Chemistry*, 2011, 13, 482-519.

**Table S1: Dataset of production protocols for silver nanoparticles**

| PIN =<br>Protocol<br>Identifi-<br>cation<br>Number | Criteria                |                           |                        |                                |                  |                              |                                             |            | Performance<br>class by DMs | Reference |
|----------------------------------------------------|-------------------------|---------------------------|------------------------|--------------------------------|------------------|------------------------------|---------------------------------------------|------------|-----------------------------|-----------|
|                                                    | Reducing<br>agent class | Capping<br>agent class    | Solvent<br>class       | Local<br>resource<br>use class | Reaction<br>time | Temperat<br>ure<br>(Celsius) | Equipmen<br>t class                         | Size class | A > B > C > D > E           |           |
| 1                                                  | Renewable -<br>Primary  | Biodegradabl<br>e polymer | Renewable -<br>Primary | No                             | 45 s             | 80                           | Microwave<br>- 1000 W -<br>Open<br>vessel   | 0-30 nm    | C                           | [1]       |
| 2                                                  | Renewable -<br>Primary  | Renewable -<br>Primary    | Renewable -<br>Primary | No                             | 60 s             | 100*                         | Microwave<br>- 1000 W -<br>Open<br>vessel   | 0-30 nm    | B                           | [2]       |
| 3                                                  | Renewable -<br>Primary  | Renewable -<br>Primary    | Renewable -<br>Primary | No                             | 20 h             | 40                           | Conventio<br>nal                            | 0-30 nm    | B                           | [3]       |
| 4                                                  | Renewable -<br>Primary  | Not needed                | Renewable -<br>Primary | No                             | 45 s             | 41                           | Microwave<br>- sealed<br>vessel - <<br>300W | 0-30 nm    | A                           | [4]       |
| 5                                                  | Renewable -<br>Primary  | Not needed                | Renewable -<br>Primary | No                             | 60 s             | 47                           | Microwave<br>- sealed<br>vessel - <<br>300W | 0-30 nm    | A                           | [4]       |
| 6                                                  | Renewable -<br>Primary  | Not needed                | Renewable -<br>Primary | No                             | 30 s             | 39                           | Microwave<br>- sealed<br>vessel - <<br>300W | 0-30 nm    | A                           | [4]       |
| 7                                                  | Renewable -<br>Primary  | Not needed                | Renewable -<br>Primary | No                             | 30 s             | 42                           | Microwave<br>- sealed<br>vessel - <         | 0-30 nm    | A                           | [4]       |

|    |                     |                     |                     |    |          |           |                                   |                  |   |      |
|----|---------------------|---------------------|---------------------|----|----------|-----------|-----------------------------------|------------------|---|------|
|    |                     |                     |                     |    |          |           | 300W                              |                  |   |      |
| 8  | Renewable - Primary | Renewable - Primary | Renewable - Primary | No | 10 s     | 150       | Microwave - sealed vesel - > 300W | 0-30 nm          | A | [5]  |
| 9  | Synthetic           | Synthetic           | Renewable - Primary | No | 30 min   | Not known | Stirring                          | 0-30 nm          | D | [6]  |
| 10 | Renewable - Primary | Synthetic           | Renewable - Primary | No | 15 min   | 25        | Not known                         | 30 -60 nm        | D | [7]  |
| 11 | Renewable - Primary | Synthetic           | Renewable - Primary | No | 15 min   | 25        | Not known                         | 0-30 nm          | D | [7]  |
| 12 | Synthetic           | Synthetic           | Synthetic           | No | 4 h 15 m | 25        | Stirring                          | 0-30 nm          | E | [8]  |
| 13 | Renewable - Primary | Not needed          | Renewable - Primary | No | 8 h      | 25        | Stirring – under 5 min            | 0-30 & 30 -60 nm | A | [9]  |
| 14 | Renewable - Primary | Not needed          | Renewable - Primary | No | 8 h      | 25        | Stirring – under 5 min            | 0-30 nm          | A | [9]  |
| 15 | Renewable - Primary | Not needed          | Renewable - Primary | No | 2 h      | 25        | Stirring – under 5 min            | 0-30 nm          | A | [10] |

|    |                     |                       |                     |     |       |       |                                    |                  |   |      |
|----|---------------------|-----------------------|---------------------|-----|-------|-------|------------------------------------|------------------|---|------|
| 16 | Renewable - Primary | Not needed            | Renewable - Primary | No  | 2 h   | 25    | Stirring - under 5 min             | 0-30 nm          | A | [10] |
| 17 | Renewable - Primary | Not needed            | Renewable - Primary | Yes | 8 h   | 37    | Static                             | 0-30 nm          | A | [11] |
| 18 | Renewable - Primary | Not needed            | Renewable - Primary | Yes | 2 h   | 26.85 | Static                             | 0-30 nm          | A | [12] |
| 19 | Renewable - Primary | Not needed            | Renewable - Primary | Yes | 8 min | 30    | Not known                          | 0-30 nm          | A | [13] |
| 20 | Renewable - Primary | Not needed            | Renewable - Primary | Yes | 6 h   | 30    | Static                             | 0-30 & 30 -60 nm | A | [14] |
| 21 | Renewable - Primary | Not needed            | Synthetic           | No  | 24 h  | 25    | Static                             | 0-30 nm          | D | [15] |
| 22 | Synthetic           | Synthetic             | Synthetic           | No  | 3 h   | 170   | Microwave - sealed vessel - > 300W | 0-30 nm          | E | [16] |
| 23 | Synthetic           | Biodegradable polymer | Renewable - Primary | No  | 3 min | 198   | Microwave - sealed vessel - > 300W | 0-30 & 30 -60 nm | D | [17] |
| 24 | Synthetic           | Biodegradable polymer | Renewable - Primary | No  | 5 s   | 100*  | Microwave - sealed vessel - > 300W | 0-30 nm          | D | [18] |
| 25 | Synthetic           | Biodegradable polymer | Renewable - Primary | No  | 2 h   | 90    | Conventional                       | 0-30 nm          | D | [19] |
| 26 | Synthetic           | Biodegradable polymer | Synthetic           | No  | 4 h   | 160   | Conventional                       | 30-60 nm         | D | [20] |

|    |                     |                       |                     |     |        |      |                                    |                 |   |      |
|----|---------------------|-----------------------|---------------------|-----|--------|------|------------------------------------|-----------------|---|------|
| 27 | Synthetic           | Biodegradable polymer | Synthetic           | No  | 4 h    | 160  | Conventional                       | 0-30 nm         | D | [20] |
| 28 | Renewable - Primary | Not needed            | Renewable - Primary | No  | 30 min | 80   | Conventional                       | 0-30 & 30-60 nm | B | [21] |
| 29 | Synthetic           | Not needed            | Renewable - Primary | No  | 8 min  | 100  | Microwave - sealed vessel - > 300W | 0-30 nm         | D | [22] |
| 30 | Renewable - Primary | Renewable - Primary   | Renewable - Primary | No  | 2 h    | 70   | Conventional                       | 0-30 nm         | C | [23] |
| 31 | Renewable - Primary | Not needed            | Renewable - Primary | No  | 8 h    | 70   | Conventional                       | 0-30 nm         | C | [24] |
| 32 | Synthetic           | Synthetic             | Synthetic           | No  | 60 s   | 100* | Microwave - 1000 W - Open vessel   | 0-30 nm         | D | [25] |
| 33 | Renewable - waste   | Not needed            | Renewable - Primary | No  | 75 min | 25   | Static                             | 30-60 nm        | C | [26] |
| 34 | Renewable - waste   | Not needed            | Renewable - Primary | No  | 45 min | 60   | Conventional                       | 0-30 nm         | C | [26] |
| 35 | Renewable - Primary | Not needed            | Renewable - Primary | No  | 3 h    | 160  | Conventional                       | 0-30 nm         | C | [27] |
| 36 | Renewable - waste   | Not needed            | Renewable - Primary | No  | 10 min | 40   | Conventional                       | 0-30 nm         | B | [28] |
| 37 | Renewable - Primary | Not needed            | Renewable - Primary | No  | 10 min | 40   | Conventional                       | 0-30 nm         | B | [28] |
| 38 | Renewable - Primary | Not needed            | Renewable - Primary | Yes | 15 min | 80   | Conventional                       | 0-30 nm         | B | [29] |

|    |                     |            |                     |     |        |      |                                    |                  |   |      |
|----|---------------------|------------|---------------------|-----|--------|------|------------------------------------|------------------|---|------|
| 39 | Renewable - Primary | Not needed | Renewable - Primary | No  | 10 min | 100  | Microwave - sealed vessel - > 300W | 0-30 & 30 -60 nm | B | [30] |
| 40 | Renewable - Primary | Not needed | Renewable - Primary | Yes | 20 min | 100  | Stirring and heating               | 0-30 nm          | B | [31] |
| 41 | Renewable - Primary | Not needed | Renewable - Primary | No  | 8 h    | 25   | Stirring                           | 0-30 & 30 -60 nm | C | [32] |
| 42 | Renewable - waste   | Not needed | Renewable - Primary | No  | 60 s   | 55   | Microwave - sealed vessel - < 300W | 0-30 nm          | B | [33] |
| 43 | Renewable - Primary | Not needed | Renewable - Primary | Yes | 10 min | 40   | Conventional                       | 0-30 nm          | B | [34] |
| 44 | Renewable - Primary | Not needed | Renewable - Primary | Yes | 20 min | 80   | Conventional                       | 30_60            | B | [35] |
| 45 | Renewable - Primary | Not needed | Renewable - Primary | Yes | 15 min | 95   | Conventional                       | 0_30             | B | [36] |
| 46 | Renewable - Primary | Not needed | Renewable - Primary | Yes | 20 min | 25   | Stirring_5 min                     | 0_30             | A | [37] |
| 47 | Synthetic           | Synthetic  | Renewable - Primary | No  | 60 s   | 100* | Micro_sealed_o300W                 | 0_30             | D | [38] |
| 48 | Renewable - Primary | Synthetic  | Renewable - Primary | No  | 24 h   | 25   | Static                             | 0_30             | A | [39] |

\*=assumed data



## References for Table S1

1. Nadagouda, M.N. and R.S. Varma, *Microwave-Assisted Shape-Controlled Bulk Synthesis of Noble Nanocrystals and Their Catalytic Properties*. Crystal Growth & Design, 2007. **7**(4): p. 686-690.
2. Raveendran, P., J. Fu, and S.L. Wallen, *A simple and "green" method for the synthesis of Au, Ag, and Au-Ag alloy nanoparticles*. Green Chemistry, 2006. **8**(1): p. 34-38.
3. Raveendran, P., J. Fu, and S.L. Wallen, *Completely "Green" Synthesis and Stabilization of Metal Nanoparticles*. Journal of the American Chemical Society, 2003. **125**(46): p. 13940-13941.
4. Baruwati, B., V. Polshettiwar, and R.S. Varma, *Glutathione promoted expeditious green synthesis of silver nanoparticles in water using microwaves*. Green Chemistry, 2009. **11**(7): p. 926-930.
5. Hu, B., et al., *Microwave-Assisted Rapid Facile "Green" Synthesis of Uniform Silver Nanoparticles: Self-Assembly into Multilayered Films and Their Optical Properties*. The Journal of Physical Chemistry C, 2008. **112**(30): p. 11169-11174.
6. Sun, Y., B. Mayers, and Y. Xia, *Transformation of Silver Nanospheres into Nanobelts and Triangular Nanoplates through a Thermal Process*. Nano Letters, 2003. **3**(5): p. 675-679.
7. Al-Thabaiti, S.A., et al., *Formation and characterization of surfactant stabilized silver nanoparticles: A kinetic study*. Colloids and Surfaces B: Biointerfaces, 2008. **67**(2): p. 230-237.
8. He, S., et al., *Formation of Silver Nanoparticles and Self-Assembled Two-Dimensional Ordered Superlattice*. Langmuir, 2001. **17**(5): p. 1571-1575.
9. Moulton, M.C., et al., *Synthesis, characterization and biocompatibility of "green" synthesized silver nanoparticles using tea polyphenols*. Nanoscale, 2010. **2**(5): p. 763-770.
10. Nadagouda, M.N. and R.S. Varma, *Green synthesis of silver and palladium nanoparticles at room temperature using coffee and tea extract*. Green Chemistry, 2008. **10**(8): p. 859-862.
11. Krishnaraj, C., et al., *Synthesis of silver nanoparticles using Acalypha indica leaf extracts and its antibacterial activity against water borne pathogens*. Colloids and Surfaces B: Biointerfaces, 2010. **76**(1): p. 50-56.
12. Sheny, D.S., J. Mathew, and D. Philip, *Phytosynthesis of Au, Ag and Au-Ag bimetallic nanoparticles using aqueous extract and dried leaf of Anacardium occidentale*. Spectrochimica Acta Part A: Molecular and Biomolecular Spectroscopy, 2011. **79**(1): p. 254-262.
13. Singhal, G., et al., *Biosynthesis of silver nanoparticles using Ocimum sanctum (Tulsi) leaf extract and screening its antimicrobial activity*. Journal of Nanoparticle Research, 2011. **13**(7): p. 2981-2988.
14. Narayanan, K.B. and N. Sakthivel, *Extracellular synthesis of silver nanoparticles using the leaf extract of Coleus amboinicus Lour*. Materials Research Bulletin, 2011. **46**(10): p. 1708-1713.
15. Nadagouda, M.N. and R.S. Varma, *Green Synthesis of Ag and Pd Nanospheres, Nanowires, and Nanorods Using Vitamin B2: Catalytic Polymerisation of Aniline and Pyrrole*. Journal of Nanomaterials, 2008(doi:10.1155/2008/782358).
16. Gao, F., Q. Lu, and S. Komarneni, *Interface Reaction for the Self-Assembly of Silver Nanocrystals under Microwave-Assisted Solvothermal Conditions*. Chemistry of Materials, 2005. **17**(4): p. 856-860.

17. Tsuji, M., et al., *Rapid Preparation of Silver Nanorods and Nanowires by a Microwave-Polyol Method in the Presence of Pt Catalyst and Polyvinylpyrrolidone*. Crystal Growth & Design, 2006. **7**(2): p. 311-320.
18. Pal, A., S. Shah, and S. Devi, *Microwave-assisted synthesis of silver nanoparticles using ethanol as a reducing agent*. Materials Chemistry and Physics, 2009. **114**(2-3): p. 530-532.
19. Das, R., S. Gang, and S.S. Nath, *Preparation and Antibacterial Activity of Silver Nanoparticles*. Journal of Biomaterials and Nanobiotechnology, 2011. **2**(472-475).
20. Zhao, T., et al., *Size-controlled preparation of silver nanoparticles by a modified polyol method*. Colloids and Surfaces A: Physicochemical and Engineering Aspects, 2010. **366**(1-3): p. 197-202.
21. Sreeram, K.J., M. Nidhin, and B.U. Nair, *Microwave Assisted Template Synthesis of Silver Nanoparticles*. Bulletin of Materials Science, 2008. **31**(7): p. 937-942.
22. Luo, Y. and X. Sun, *Rapid, single-step preparation of dendrimer-protected silver nanoparticles through a microwave-based thermal process*. Materials Letters, 2007. **61**(8-9): p. 1622-1624.
23. Gao, X., et al., *Green synthesis and characteristic of core-shell structure silver/starch nanoparticles*. Materials Letters, 2011. **65**(19-20): p. 2963-2965.
24. Huang, H. and X. Yang, *Synthesis of polysaccharide-stabilized gold and silver nanoparticles: a green method*. Carbohydrate Research, 2004. **339**(15): p. 2627-2631.
25. Kundu, S., K. Wang, and H. Liang, *Size-Controlled Synthesis and Self-Assembly of Silver Nanoparticles within a Minute Using Microwave Irradiation*. The Journal of Physical Chemistry C, 2008. **113**(1): p. 134-141.
26. Kaviya, S., et al., *Biosynthesis of silver nanoparticles using citrus sinensis peel extract and its antibacterial activity*. Spectrochimica Acta Part A: Molecular and Biomolecular Spectroscopy, 2011. **79**(3): p. 594-8.
27. Dong, C., et al., *Facile and one-step synthesis of monodisperse silver nanoparticles using gum acacia in aqueous solution*. Journal of Molecular Liquids, 2014. **196**(0): p. 135-141.
28. Ahmad, N., et al., *Rapid synthesis of silver nanoparticles using dried medicinal plant of basil*. Colloids and Surfaces B: Biointerfaces, 2010. **81**(1): p. 81-86.
29. Bar, H., et al., *Green synthesis of silver nanoparticles using seed extract of *Jatropha curcas**. Colloids and Surfaces A: Physicochemical and Engineering Aspects, 2009. **348**(1-3): p. 212-216.
30. Kou, J. and R.S. Varma, *Beet juice utilization: Expeditious green synthesis of noble metal nanoparticles (Ag, Au, Pt, and Pd) using microwaves*. RSC Advances, 2012. **2**(27): p. 10283.
31. Vidhu, V.K., S.A. Aswathy, and D. Philip, *Green synthesis of silver nanoparticles using *Macrotyloma uniflorum**. Spectrochim Acta A Molecular and Biomolecular Spectroscopy, 2011. **83**: p. 392-397.
32. Nadagouda, M.N., et al., *Synthesis of Silver and Gold Nanoparticles Using Antioxidants from Blackberry, Blueberry, Pomegranate and Turmeric Extracts*. ACS Sustainable Chemistry & Engineering, 2014. **2**: p. 1717-1723.
33. Baruwati, B. and R.S. Varma, *High Value Products from Waste: Grape Pomace Extract—A Three-in-One Package for the Synthesis of Metal Nanoparticles*. ChemSusChem, 2009. **2**(11): p. 1041-1044.
34. Jha, A.K., et al., *Plant system: Nature's nanofactory*. Colloids and Surfaces B: Biointerfaces, 2009. **73**(2): p. 219-223.

35. Prasad, T. and E.K. Elumalai, *Biofabrication of Ag nanoparticles using Moringa oleifera leaf extract and their antimicrobial activity*. Asian Pacific Journal of Tropical Biomedicine, 2011. **1**(6): p. 439-442.
36. Cruz, D., et al., *Preparation and physicochemical characterization of Ag nanoparticles biosynthesized by Lippia citriodora (Lemon Verbena)*. Colloids and Surfaces B: Biointerfaces, 2010. **81**(1): p. 67-73.
37. Philip, D., et al., *Murraya Koenigii leaf-assisted rapid green synthesis of silver and gold nanoparticles*. Spectrochimica Acta Part A: Molecular and Biomolecular Spectroscopy, 2011. **78**(2): p. 899-904.
38. Pal, A., S. Shah, and S. Devi, *Synthesis of Au, Ag and Au-Ag alloy nanoparticles in aqueous polymer solution*. Colloids and Surfaces A: Physicochemical and Engineering Aspects, 2007. **302**(1-3): p. 51-57.
39. Chandran, S.P., et al., *Synthesis of Gold Nanotriangles and Silver Nanoparticles Using Aloevera Plant Extract*. Biotechnology Progress, 2006. **22**(2): p. 577-583.

## Additional methodological considerations

### Problem situation

The selection of the researchers involved in the case study followed the definitions of experts reported in the literature, namely those individuals who are “*highly regarded by peers, [...], whose performance shows consummate skill and economy of effort, and who can deal effectively with rare and “tough” cases*”<sup>1</sup>. Additionally, the experts who contributed to develop the model were also “*qualified to teach those at a lower level*” and are part of “*an elite group of experts whose judgments set the regulations, standards, or ideals*”, fitting for the highest level of expertise as defined by Hoffman and colleagues<sup>1</sup>.

Expert judgement has already been applied in the nanomanufacturing area for the identification of appropriate risk management measures. The developed model demonstrated how the use of expertise within domains that lack quantitative data and tools can advance the safety of nanomanufacturing<sup>2</sup>.

### Evaluation model

For comparison purposes, all the selected protocols lead to spherical and monodispersed nanoparticles, with size range used to account for the technical quality of the produced particles. In fact, the aim of each protocol is the synthesis of silver nanoparticles. Consequently, there is no real implementation of the green chemistry principles if the nanoparticles cannot be used in practice when they do not satisfy quality requirements<sup>3-5</sup>. For the sake of simplicity, the terms “implementation of green chemistry principles” will be used to include the concept of adopting the principles together with the satisfaction of the quality requirements.

## References for additional methodological considerations

1. Hoffman, R.R., et al., *Eliciting Knowledge from Experts: A Methodological Analysis*. Organizational Behavior and Human Decision Processes, 1995. **62**(2): p. 129-158.
2. Naidu, S.R., *Towards Sustainable Development of Nanomanufacturing*. 2012, University of Tennessee.
3. Hutchison, J.E., *Greener nanoscience. A proactive approach to advancing applications and reducing implications of nanotechnology*. ACSNano, 2008. **2**(3): p. 395-402.
4. Dahl, J.A., B.L.S. Maddux, and J.E. Hutchison, *Toward Greener Nanosynthesis*. Chemical Reviews, 2007. **107**(6): p. 2228-2269.
5. Kaviya, S., et al., *Biosynthesis of silver nanoparticles using citrus sinensis peel extract and its antibacterial activity*. Spectrochimica Acta Part A: Molecular and Biomolecular Spectroscopy, 2011. **79**(3): p. 594-8.

## Basic notions of Dominance-based Rough Set Approach (DRSA)

An information table (Table 1) represents the starting point of any DRSA analysis. Its rows are the alternatives to be evaluated, while the columns include the condition attributes ( $C$ ), the evaluation criteria that are needed to assess the alternatives, and the decision attribute ( $D$ ), an overall evaluation of each object in the table.

More formally, an information table can be characterized as  $S = \langle U, Q, V, f \rangle$ , where  $U$  = set of objects;  $Q$  = set of attributes;  $V = \bigcup_{q \in Q} V_q$ ,  $V_q$  = domain of attribute  $q$ ; and  $f: U \times Q \rightarrow V$  is a total function, so that  $f(x, q) \in V_q$  for every  $q \in Q, x \in U$ , called information function.

| Alternative | Condition attributes (criteria), $S_{X,C_y^*}$ |             |             | Decision attribute<br>(Performance class) |
|-------------|------------------------------------------------|-------------|-------------|-------------------------------------------|
|             | $C_1$                                          | $C_2$       | $C_3$       |                                           |
| I           | $S_{A,C_1}$                                    | $S_{A,C_2}$ | $S_{A,C_3}$ | High                                      |
| II          | $S_{B,C_1}$                                    | $S_{B,C_2}$ | $S_{B,C_3}$ | Low                                       |
| ...         | ...                                            | ...         | ...         | ...                                       |

**Table 1:** Exemplary information table for DRSA application, \*:  $S_{X,C_y}$ : score of alternative X on criterion y

In this case study,  $U$  is composed of the considered nanoparticle production protocols (I, II, etc.), while  $Q$  is composed of the assessment criteria and the decision attribute representing the level of “performance” of each synthesis protocol from set  $U$ . The DM defines this decision attribute, by choosing one of five possible preference-ordered values (i.e.  $A > B > C > D > E$ ) depending on the implementation of green chemistry principles and satisfaction of quality requirements that the criteria of each protocol convey.

For comparisons of objects performance in DRSA, it is necessary to use the notion of *weak preference relation*  $\geq_q$  on  $U$  with respect to criterion  $q$ , so that  $x \geq_q y$  stands for “object  $x$  is at least as good as object  $y$  with respect to criterion  $q$ ”.

The decision attribute is used to define a set of classes (**CI**) for the classification of the nanoparticle production protocols, so that  $\mathbf{CI} = \{Cl_t, t \in \{1, \dots, n\}\}$  and  $n$  is the total number of classes, and each object  $x \in U$  can belong to one  $Cl_t$ . Furthermore, considering two classes  $r$  and  $s$ , with  $r > s$ , objects from  $Cl_r$  are better than those from  $Cl_s$ , which is in relation to the previous notation  $x \geq y$ , so that  $[x \in Cl_r, y \in Cl_s, r > s] \Rightarrow [x \geq y \text{ and not } y \geq x]$ .

In the context of evaluation of the nanoparticle production protocols this can be seen as a decision-making process in terms of classification into different classes based on the green chemistry principles implementation:  $Cl_E, Cl_D, Cl_C, Cl_B$  and  $Cl_A$  which represent a very

low (E), low (D), medium (C), high (B) and very high (A) performance of each protocol, respectively.

The classes are ordered in increasing level of desirability, so that, e.g.,  $x > y$  if  $x \in Cl_C$  and  $y \in Cl_D$ , nanosynthesis protocol  $x$  performs at a medium level, whereas nanosynthesis protocol  $y$  is only implementing green chemistry principles at a low level. DRSA is performing approximation of two types of unions of classes - the upward one

$Cl_t^{\geq} = \bigcup_{s \geq t} Cl_s$ , and the downward one  $Cl_t^{\leq} = \bigcup_{s \leq t} Cl_s$ , with  $t = 1, \dots, n$ .

In this decision problem, we have that the upward union of classes are:

- $Cl_E^{\geq}$ , nanoparticle production protocols with green chemistry principles implementation at least very low, i.e. very low or low or medium or high or very high;
- $Cl_D^{\geq}$ , nanoparticle production protocols with green chemistry principles implementation at least low, i.e. low or medium or high or very high;
- $Cl_C^{\geq}$ , nanoparticle production protocols with green chemistry principles implementation at least medium, i.e. medium or high or very high;
- $Cl_B^{\geq}$ , nanoparticle production protocols with green chemistry principles implementation at least high, i.e. high or very high;
- $Cl_A^{\geq}$ , nanoparticle production protocols with green chemistry principles implementation at least very high, i.e. very high;

On the contrary, the downward union of classes are:

- $Cl_E^{\leq}$ , nanoparticle production protocols with green chemistry principles implementation at most very low, i.e. very low;
- $Cl_D^{\leq}$ , nanoparticle production protocols with green chemistry principles implementation at most low, i.e. low or very low;
- $Cl_C^{\leq}$ , nanoparticle production protocols with green chemistry principles implementation at most medium, i.e. medium or low or very low;
- $Cl_B^{\leq}$ , nanoparticle production protocols with green chemistry principles implementation at most high, i.e. high or medium or low or very low;
- $Cl_A^{\leq}$ , nanoparticle production protocols with green chemistry principles implementation at most very high, i.e. very high or high or medium or low or very low;

The notion  $x \in Cl_C^{\geq}$  signifies that “protocol  $x$  belongs at least to class  $Cl_C$ ”, while  $x \in Cl_C^{\leq}$  means that “protocol  $x$  belongs at most to class  $Cl_C$ ”.

One property that has to be noted here is that

$$Cl_{t-1}^{\leq} = U - Cl_t^{\geq} \quad \text{and} \quad Cl_t^{\geq} = U - Cl_{t-1}^{\leq}$$

In our case study, the nanoparticle production protocols that do not have at least C environmental sustainability, i.e.  $- Cl_C^{\geq}$ , are those with environmental sustainability at most D, i.e.  $Cl_D^{\leq}$ .

The decision rule approach approximates the information reported with the decision attributes by considering the knowledge reported in the condition attributes (criteria). In order to extract information from these attributes, the DRSA defines:

- Nanoparticle production protocols dominating  $x$ , i.e. nanoparticle production protocols that perform at least as good as  $x$  in terms of the set of condition attributes;
- Nanoparticle production protocols dominated by  $x$ , i.e. nanoparticle production protocols which perform worse than  $x$  in relation to the set of condition attributes.

$x$  dominates  $y$  is denoted as  $x D_P y$  (with  $P \subseteq C$ ), if  $x \geq_q y$  for every  $q \in P$  (set of  $q$ ). Pieces of information can be then obtained and are defined as granules of knowledge:

- Objects dominating  $x$ , named  $P$ -dominating set:  $D_P^+(x) = \{y \in U: y D_P x\}$
- Objects dominated by  $x$ , named  $P$ -dominated set:  $D_P^-(x) = \{y \in U: x D_P y\}$ .

For example, if the criterion is the use of reducing agent, assessed with preference-ordered values (renewable  $>$  synthetic), and reducing agent for nanosynthesis protocol  $x$  is assessed as renewable, then:

- $D_P^+(x)$  includes all the nanoparticle production protocols with renewable score for type of reducing agent; whereas
- $D_P^-(x)$  includes all the nanoparticle production protocols with synthetic score for type of reducing agent.

DRSA can also handle ambiguous information, which for an object  $x$  and criteria from  $P$  arises when there is at least one object which is not worse than  $x$  with respect to the condition attributes but it was assigned to a lower class. For instance, in the previous example protocol  $x$  was assessed as renewable for the type of reducing agent. In the case that synthesis protocol  $x$  is assigned to  $Cl_c$  and another protocol  $y$  is assessed as renewable for the type of reducing agent but assigned to  $Cl_b$ , then an ambiguity is in place between  $x$  and  $y$  in relation to the criterion “type of reducing agent”. Information management including ambiguity handling is performed with DRSA by means of approximation sets. With respect to  $P \subseteq C$ , the objects belonging to  $Cl_t^{\geq}$  with no ambiguity represent the  $P$ -lower approximation of  $Cl_t^{\geq}$  (i.e.  $\underline{P}(Cl_t^{\geq})$ ), while the group of objects that could belong to  $Cl_t^{\geq}$  are the  $P$ -upper approximation of  $Cl_t^{\geq}$  (i.e.  $\overline{P}(Cl_t^{\geq})$ ):

$$\begin{aligned} \underline{P}(Cl_t^{\geq}) &= \left\{ x \in \bigcup : D_P^+(x) \subseteq Cl_t^{\geq} \right\}, \\ \overline{P}(Cl_t^{\geq}) &= \bigcup_{x \in Cl_t^{\geq}} D_P^+(x) \end{aligned} \quad , \text{ for } t=1, \dots, n.$$

For example, if there is no ambiguity between nanoparticle production protocols  $x$  and  $y$ , then  $x$  and  $y$  are part of the lower approximations of the nanoparticle production protocols that are at least medium in performance,  $\underline{P}(Cl_c^{\geq})$ . If there is an ambiguity in

place, the two nanoparticle production protocols belong only to the upper approximations of the class medium,  $\bar{P}(Cl_C^{\geq})$ , but none to its lower approximation  $\underline{P}(Cl_C^{\geq})$ . The reasoning is the same for the dominated sets:

$$\begin{aligned}\underline{P}(Cl_t^{\leq}) &= \{x \in \bigcup : D_{\bar{P}}(x) \subseteq Cl_t^{\leq}\}, \\ \bar{P}(Cl_t^{\leq}) &= \bigcup_{x \in Cl_t^{\geq}} D_{\bar{P}}(x), \text{ for } t=1, \dots, n.\end{aligned}$$

The areas of ambiguity in relation to criteria from  $P$  are defined as  $P$ -doubtful regions and are expressed as:

$$\begin{aligned}Bn_p(Cl_t^{\geq}) &= \bar{P}(Cl_t^{\geq}) - \underline{P}(Cl_t^{\geq}), \\ Bn_p(Cl_t^{\leq}) &= \bar{P}(Cl_t^{\leq}) - \underline{P}(Cl_t^{\leq}), \text{ for } t=1, \dots, n.\end{aligned}$$

In the illustrative example,  $x$  and  $y$  are part of the boundary regions of nanoparticle production protocols at least in the medium performance class,  $Bn_p(Cl_C^{\geq})$ .

For every  $t = 1, \dots, n$ , and  $P \subseteq C$ , the quality of the approximation is defined as:

$$\gamma_P(Cl) = \frac{\text{card}\left[U - \left(\bigcup_{t \in T} Bn_p(Cl_t^{\geq})\right)\right]}{\text{card}(U)} = \frac{\text{card}\left[U - \left(\bigcup_{t \in T} Bn_p(Cl_t^{\leq})\right)\right]}{\text{card}(U)}$$

This important ratio indicates the number of objects correctly classified with respect to the whole set. In general, the higher the number of criteria, the higher the quality of classification, as additional criteria can render non-ambiguous objects that were ambiguous with fewer criteria. Lastly, the minimal (with respect to inclusion) subset of criteria  $P \subseteq C$  so that  $\gamma_P(Cl) = \gamma_C(Cl)$  is named reduct of  $\mathbf{Cl}$ , indicated as  $RED_{Cl}$ . The reduct  $P$  represents the minimal group of criteria from  $C$  so that no ambiguous object can become non-ambiguous when new criteria are added.

## Decision rules from DRSA

DRSA provides useful contribution to the decision-making process, as from the upward and downward union of classes it is possible to induce structured information in the form of "if ... , then ..." decision rules. For unions of classes  $Cl_t^{\geq}$  or  $Cl_s^{\leq}$ , the certain or possible decision rules are supported by objects  $\in \underline{P}(Cl_t^{\geq})$  or  $\underline{P}(Cl_s^{\leq})$ , or by objects  $\in \bar{P}(Cl_s^{\leq})$  or  $\bar{P}(Cl_t^{\geq})$ , respectively; they advance the classification to "at least class  $Cl_t$ " or "at most class  $Cl_s$ ", either certainly or possibly. In the other cases, the decision rules supported by objects  $\in Bn_p(Cl_t^{\geq})$  or  $Bn_p(Cl_t^{\leq})$  advance the approximate classification to classes between  $Cl_s$  and  $Cl_t$  ( $s < t$ ).

Five types of decision rules can be obtained:

- Certain  $D_{\geq}$ - decision rules: they present the conditions to assign object to  $Cl_t^{\geq}$  without ambiguity: if  $x_{q1} \geq_{q1} r_{q1}$  and  $x_{q2} \geq_{q2} r_{q2}$  ...and  $x_{qn} \geq_{qn} r_{qn}$ , then  $x \in Cl_t^{\geq}$ ;



- Possible  $D \geq$ - decision rules: they present the conditions to assign object to  $Cl_t^{\geq}$  with or without ambiguity: if  $x_{q1} \geq_{q1} r_{q1}$  and  $x_{q2} \geq_{q2} r_{q2} \dots$  and  $x_{qn} \geq_{qn} r_{qn}$ , then  $x$  possibly  $\in Cl_t^{\geq}$ ;
- Certain  $D \leq$ - decision rules: they present the conditions to assign object to  $Cl_t^{\leq}$  without ambiguity: if  $x_{q1} \leq_{q1} r_{q1}$  and  $x_{q2} \leq_{q2} r_{q2} \dots$  and  $x_{qn} \leq_{qn} r_{qn}$ , then  $x \in Cl_t^{\leq}$ ;
- Possible  $D \leq$ - decision rules: they present the conditions to assign object to  $Cl_t^{\leq}$  with or without ambiguity: if  $x_{q1} \leq_{q1} r_{q1}$  and  $x_{q2} \leq_{q2} r_{q2} \dots$  and  $x_{qn} \leq_{qn} r_{qn}$ , then  $x$  possibly  $\in Cl_t^{\leq}$ ;
- Approximate  $D \geq \leq$ - decision rules: they present the conditions to assign object to  $Cl_s \cup Cl_{s+1} \cup \dots \cup Cl_t$ : if  $x_{q1} \geq_{q1} r_{q1} \dots$  and  $x_{qn} \geq_{qn} r_{qn}$  and  $x_{qn+1} \leq_{qn+1} r_{qn+1} \dots$  and  $x_{qp} \leq_{qp} r_{qp}$ , then  $x \in Cl_s \cup Cl_{s+1} \cup \dots \cup Cl_t$ .

## New classification scheme based on DRSA to classify new or existing protocols

In order to identify the recommended class for a new or existing protocol, two scores need to be calculated. The first one,  $Score_R^+(Cl_v, m)$ , accounts for the credibility and coverage factors of all the rules (i.e.  $R$ ) that suggests the assignment of the protocol to class  $Cl_t$ . This value is the product of credibility ( $CR_{\rho_i}$ ) and coverage factor ( $CF_{\rho_i}$ ) of every decision rule ( $e.g., \rho_i$ ) with respect to any individual class ( $e.g., Cl_t$ ):

$$CR_{\rho_i}(Cl_t) = \frac{|Cond_{\rho_i} \cap Cl_t|}{|Cond_{\rho_i}|}$$

$$CF_{\rho_i}(Cl_t) = \frac{|Cond_{\rho_i} \cap Cl_t|}{|Cl_t|}$$

where  $Cond_{\rho_i}$  is the set of protocols that satisfy the conditions of rule  $\rho_i$ , and  $|Cond_{\rho_i}|$ ,  $|Cl_t|$ , and  $|Cond_{\rho_i} \cap Cl_t|$  are the cardinalities of the group of protocols verifying  $Cond_{\rho_i}$ , the protocols belonging to class  $Cl_t$ , and the protocols satisfying  $Cond_{\rho_i}$  and belonging to class  $Cl_t$ , respectively.  $Score_R^+(Cl_v, m)$  is calculated as follows:

$$Score_R^+(Cl_v, m) = \frac{|(Cond_{\rho_1} \cap Cl_t) \cup \dots \cup (Cond_{\rho_k} \cap Cl_t)|^2}{|Cond_{\rho_1} \cup \dots \cup Cond_{\rho_k}| |Cl_t|}$$

where  $Cond_{\rho_1}, \dots, Cond_{\rho_k}$  are the conditions parts of the rules supporting the assignment to class of interest  $Cl_t$ .

The other score,  $Score_{\bar{R}}(Cl_t, m)$ , embraces the credibility and coverage factors of all the rules that suggest an assignment of the protocol to a class other than  $Cl_t$ . This score has the following formula:

$$Score_{\bar{R}}(Cl_t, m) = \frac{\left| \left( Cond_{\rho_{k+1}} \cap Cl_{\rho_{k+1}}^{\geq} \right) \cup \dots \cup \left( Cond_{\rho_l} \cap Cl_{\rho_l}^{\geq} \right) \cup \left( Cond_{\rho_{l+1}} \cap Cl_{\rho_{l+1}}^{\geq} \right) \right|}{\left| Cond_{\rho_{k+1}} \cup \dots \cup Cond_{\rho_l} \cup Cond_{\rho_{l+1}} \cup \dots \cup Cond_{\rho_h} \right| \left| Cl_{\rho_{k+1}}^{\geq} \cup \dots \right|}$$

where  $Cl_{\rho_{k+1}}^{\geq}, \dots, Cl_{\rho_l}^{\geq}$  and  $Cl_{\rho_{l+1}}^{\leq}, \dots, Cl_{\rho_h}^{\leq}$  are the upward and downward unions of classes other than  $Cl_t$  recommended by the decision rules. The net value,  $Score_{\bar{R}}^{net}(Cl_t, m)$ , resulting from  $Score_R^+(Cl_t, m) - Score_{\bar{R}}(Cl_t, m)$ , is an indication of the strength of the assignment to class  $Cl_t$  and the final recommendation of a class depends on the highest net score.

**Figure S1: Green chemistry-based classification model - At least rules\***

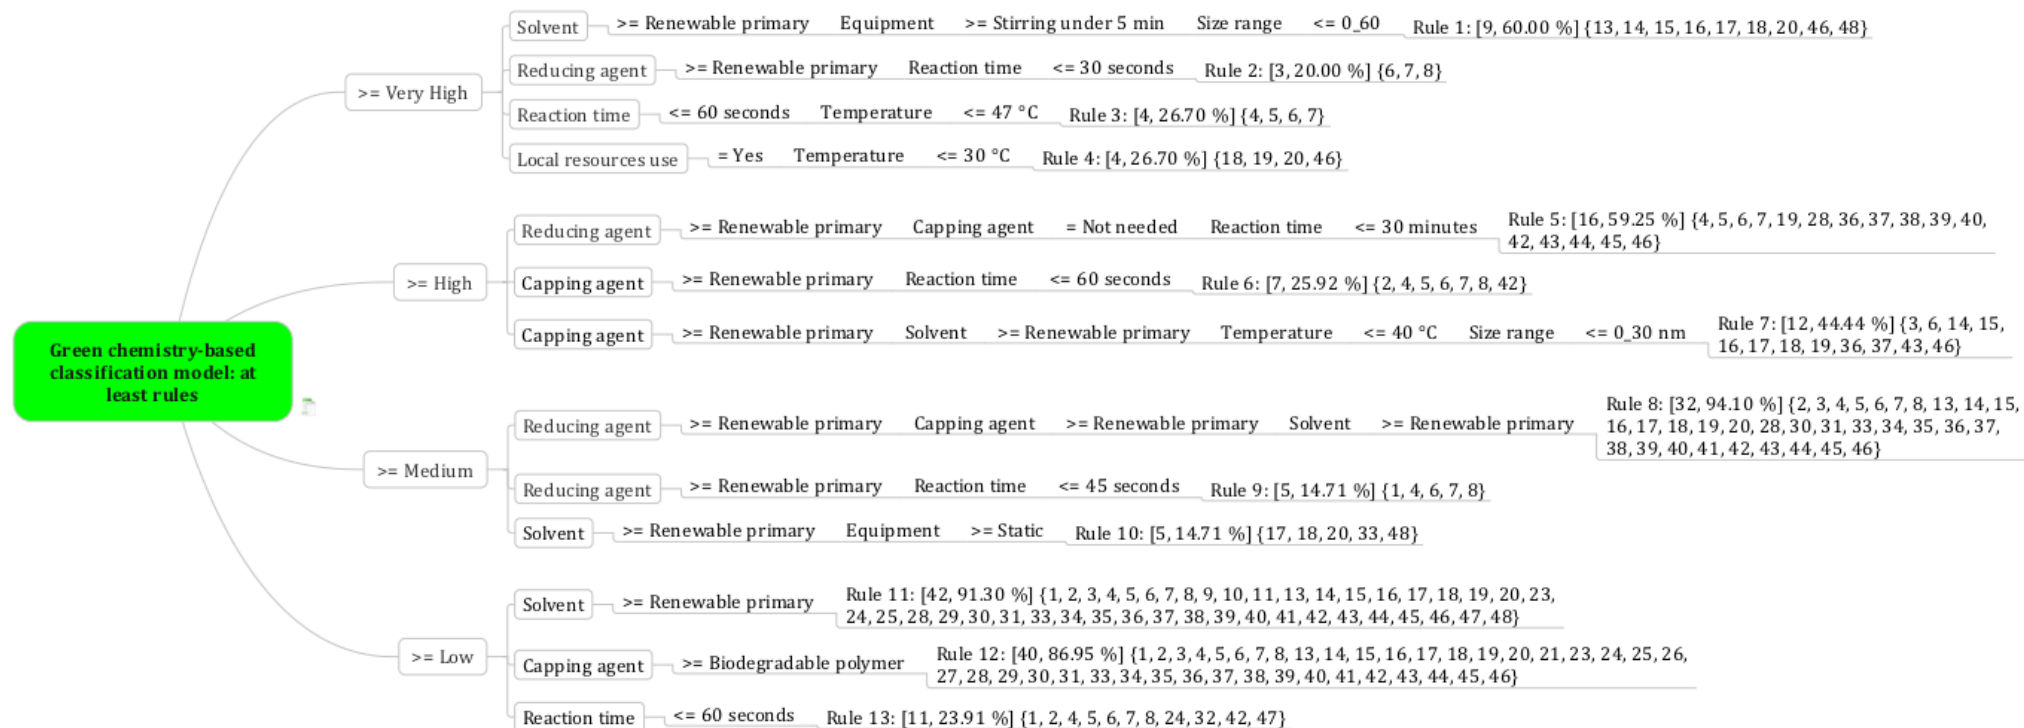

\* = Each rule characterization is reported as follows: Rule x: [y, z%] {p, q, t} with: x = rule number; y = number of protocols that support the rule; z = coverage factor of the rule (i.e. percentage of number of protocols that satisfy the conditions and are assigned to the class or union of classes); p, q, t = identification numbers of the protocols in the dataset

**Figure S2: Green chemistry-based classification model - At most rules\***

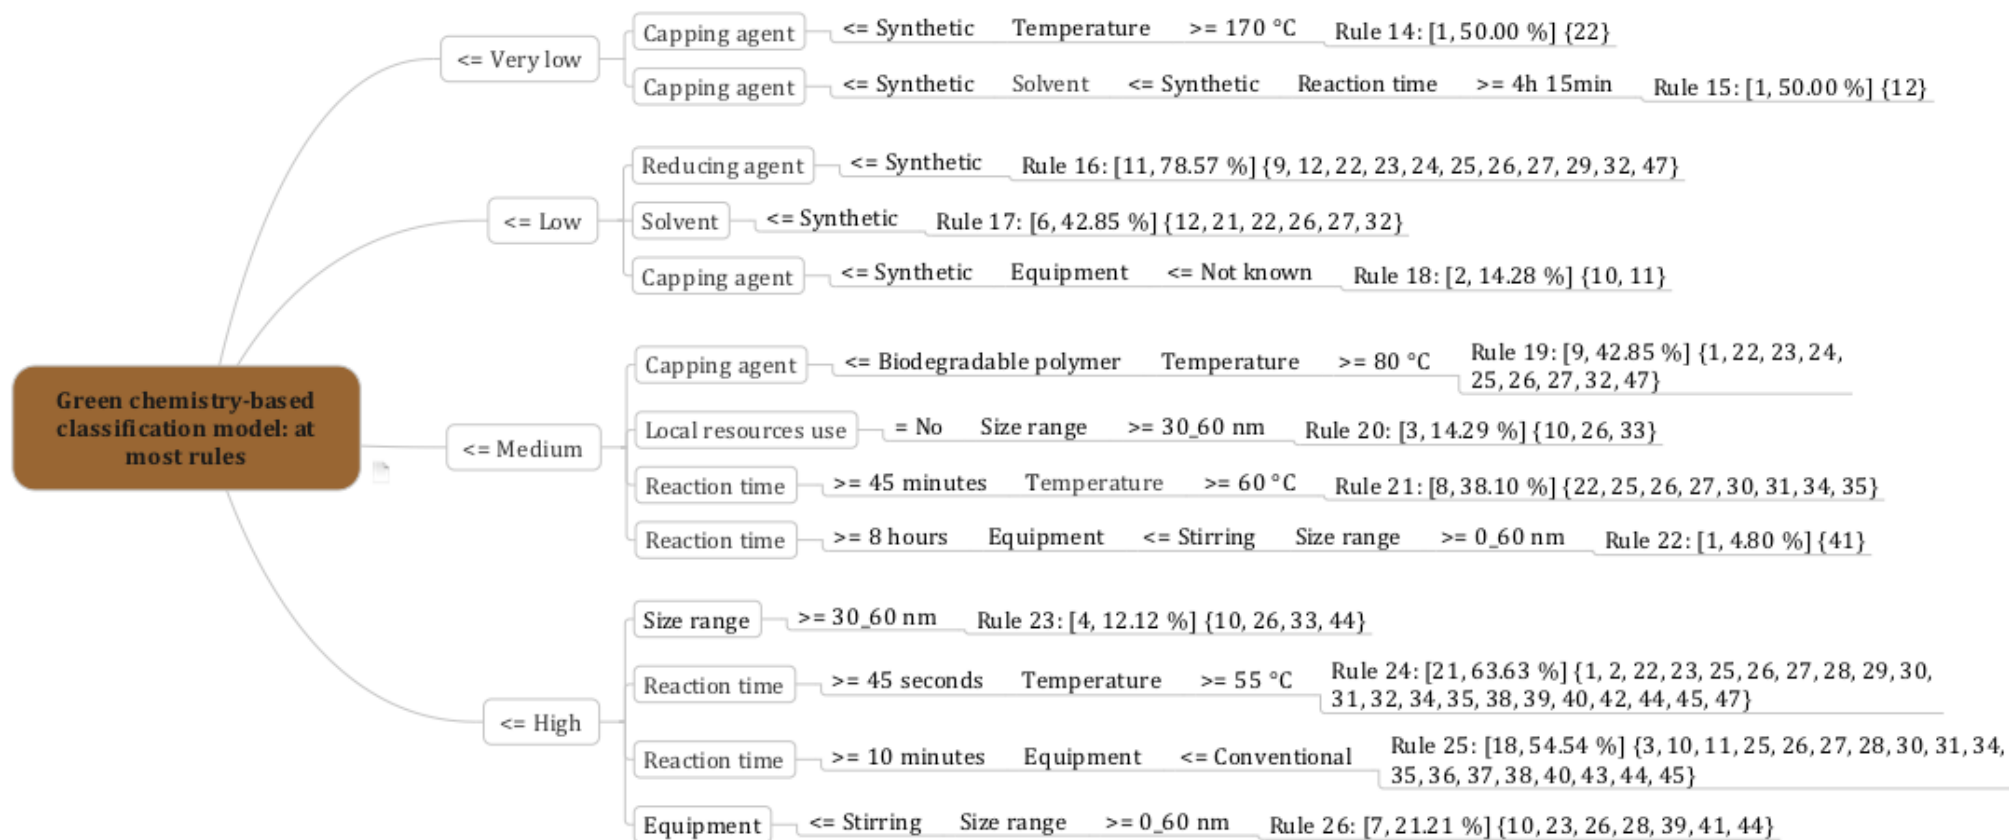

\* = Each rule characterization is reported as follows: Rule x: [y, z%] {p, q, t} with: x = rule number; y = number of protocols that support the rule; z = coverage factor of the rule (i.e. percentage of number of protocols that satisfy the conditions and are assigned to the class or union of classes); p, q, t = identification numbers of the protocols in the dataset

## Extended calculations of scores for test protocol $t_1$ and $t_3$ with new classification scheme following formulas described in Section 2.2

$$Score_R^+(Cl_p, t_1) = \frac{|Protocols\ satisfying\ conditions\ of\ covering\ rules\ and\ belonging\ to\ class\ p|}{|Protocols\ satisfying\ conditions\ of\ covering\ rules\ that\ include\ Cl_p\ as\ a\ recommendation|}$$

$$Score_R^-(Cl_p, t_1) = \frac{|Protocols\ satisfying\ conditions\ of\ covering\ rules\ and\ not\ belonging\ to\ class\ p|}{|Protocols\ satisfying\ conditions\ of\ covering\ rules\ that\ recommend\ a\ class\ different\ from\ p|}$$

$$Score_R^{net}(Cl_p, t_1) = Score_R^+(Cl_p, t_1) - Score_R^-(Cl_p, t_1)$$

### Test protocol $t_1$

Covering rules: 3, 5, 6, 8, 11, 12, 13.

#### Class A

$$Score_R^+(Cl_A, t_1) = \frac{|4,5,6,7,8, 13,14,15,16,17,18,19,20,46,47,48,49,50,51,52,53,54,55,56,57,58,59,60,61,62,63,64,65,66,67,68,69,70,71,72,73,74,75,76,77,78,79,80,81,82,83,84,85,86,87,88,89,90,91,92,93,94,95,96,97,98,99,100|}{|1, 2, 3, 4, 5, 6, 7, 8, 9, 10, 11, 13, 14, 15, 16, 17, 18, 19, 20, 21,23, 24, 25, 26,27,28, 29, 30, 31, 32,33,34,35,36,37,38,39,40,41,42,43,44,45,46|} = \frac{15^2}{(46 * 15)} = 0.33$$

$$Score_R^-(Cl_A, t_1) = 0$$

$$Score_R^{net}(Cl_A, t_1) = 0.33 - 0 = 0.33$$

#### Class B

$$Score_R^+(Cl_B, t_1) = \frac{|2,3,28,36,37,38,39,40,42,43,44,45,46,47,48,49,50,51,52,53,54,55,56,57,58,59,60,61,62,63,64,65,66,67,68,69,70,71,72,73,74,75,76,77,78,79,80,81,82,83,84,85,86,87,88,89,90,91,92,93,94,95,96,97,98,99,100|}{|1, 2, 3,4, 5, 6, 7, 8, 9, 10, 11, 13, 14, 15, 16, 17, 18, 19, 20, 21,23, 24, 25, 26,27,28, 29, 30, 31, 32,33,34,35,36,37,38,39,40,41,42,43,44,45,46|} = \frac{12^2}{(46 * 12)} = 0.27$$

$$Score_R^-(Cl_B, t_1) = \frac{|4,5,6,7|^2}{|4,5,6,7| * 36} = \frac{4^2}{(4 * 36)} = 0.05$$

$$Score_R^{net}(Cl_B, t_1) = 0.27 - 0.05 = 0.22$$

### **Class C**

$$\begin{aligned}
 Score_R^+(Cl_C, t_1) &= \frac{|1,30,31,33,34,35,41|^2}{|1,2,3,4,5,6,7,8,9,10,11,13,14,15,16,17,18,19,20,21,23,24,25,26,27,28,29,30,31,32,33|^2} \\
 &= \frac{7^2}{(46 * 7)} = 0.15
 \end{aligned}$$

$$\begin{aligned}
 Score_R^-(Cl_C, t_1) &= \frac{|2,4,5,6,7,8,19,28,36,37,38,39,40,42,43,44,45,46|^2}{|2,4,5,6,7,8,19,28,36,37,38,39,40,42,43,44,45,46| * 41} = \frac{18^2}{(18 * 41)} = 0.44
 \end{aligned}$$

$$Score_R^{net}(Cl_C, t_1) = 0.15 - 0.44 = -0.29$$

### **Class D**

$$\begin{aligned}
 Score_R^+(Cl_D, t_1) &= \frac{|9,10,11,21,23,24,25,26,27,29,32|^2}{|1,2,3,4,5,6,7,8,9,10,11,13,14,15,16,17,18,19,20,21,23,24,25,26,27,28,29,30,31,32,33|^2} \\
 &= \frac{11^2}{(46 * 12)} = 0.22
 \end{aligned}$$

$$\begin{aligned}
 Score_R^-(Cl_D, t_1) &= \frac{|2,3,4,5,6,7,8,13,14,15,16,17,18,19,20,28,30,31,33,34,35,36,37,38,39,40,41,42,43,44,45,46|^2}{|2,3,4,5,6,7,8,13,14,15,16,17,18,19,20,28,30,31,33,34,35,36,37,38,39,40,41,42,43,44,45,46| * 36} \\
 &= \frac{32^2}{(32 * 36)} = 0.89
 \end{aligned}$$

$$Score_R^{net}(Cl_D, t_1) = 0.22 - 0.89 = -0.67$$

### **Test protocol t<sub>3</sub>**

Covering rules: 11, 12, 19, 20, 23, 24, 25, 26.

### **Class E**

$$\begin{aligned}
Score_R^+(Cl_E, t_3) &= \frac{|22|^2}{|1, 2, 3, 10, 11, 22, 23, 24, 25, 26, 27, 28, 29, 30, 31, 32, 33, 34, 35, 36, 37, 38, 39, 40, 41, 42, 43, 44, 45, 47, | * 2|} \\
&= \frac{1^2}{(30 * 2)} = 0.02
\end{aligned}$$

$$\begin{aligned}
Score_R^-(Cl_E, t_3) &= \frac{|1, 2, 3, 4, 5, 6, 7, 8, 9, 10, 11, 13, 14, 15, 16, 17, 18, 19, 20, 21, 23, 24, 25, 26, 27, 28, 29, 30, 31, 33, 34, 35, 36, 37, 38, 39, 40, 41, 42, 43, 44, 45, 47, |}{|1, 2, 3, 4, 5, 6, 7, 8, 9, 10, 11, 13, 14, 15, 16, 17, 18, 19, 20, 21, 23, 24, 25, 26, 27, 28, 29, 30, 31, 33, 34, 35, 36, 37, 38, 39, 40, 41, 42, 43, 44, 45, 47, |} \\
&= \frac{45^2}{(45 * 46)} = 0.98
\end{aligned}$$

$$Score_R^{net}(Cl_E, t_3) = 0.02 - 0.98 = -0.96$$

### **Class D**

$$\begin{aligned}
Score_R^+(Cl_D, t_3) &= \frac{|9, 10, 11, 21, 23, 24, 25, 26, 27, 29, 32, 4|}{|1, 2, 3, 4, 5, 6, 7, 8, 9, 10, 11, 13, 14, 15, 16, 17, 18, 19, 20, 21, 22, 23, 24, 25, 26, 27, 28, 29, 30, 31, 3|} \\
&= \frac{12^2}{(47 * 12)} = 0.26
\end{aligned}$$

$$Score_R^-(Cl_D, t_3) = 0$$

$$Score_R^{net}(Cl_D, t_3) = 0.26 - 0 = 0.26$$

### **Class C**

$$\begin{aligned}
Score_R^+(Cl_C, t_3) &= \frac{|1, 30, 31, 33, 34, 35, 41|^2}{|1, 2, 3, 4, 5, 6, 7, 8, 9, 10, 11, 13, 14, 15, 16, 17, 18, 19, 20, 21, 23, 24, 25, 26, 27, 28, 29, 30, 31, 32, 3|} \\
&= \frac{7^2}{(47 * 7)} = 0.15
\end{aligned}$$

$$Score_R^-(Cl_C, t_3) = 0$$

$$Score_R^{net}(Cl_C, t_3) = 0.15 - 0 = 0.15$$

### **Class B**

$$\begin{aligned}
Score_R^+(Cl_B, t_3) &= \frac{|2,3,28,36,37,38,39,40,42,43,44,45|^2}{|1, 2, 3,4, 5, 6, 7, 8, 9, 10, 11, 13, 14, 15, 16, 17, 18, 19, 20, 21,23, 24, 25, 26,27,28, 29, 30, 31,,33, 3|} \\
&= \frac{12^2}{(45 * 12)} = 0.27
\end{aligned}$$

$$Score_R^-(Cl_B, t_3) = \frac{|1,10,22,23,24,25,26,27,32,33,47|^2}{|1,10,22,23,24,25,26,27,32,33,47| * 36} = \frac{11^2}{(11 * 36)} = 0.31$$

$$Score_R^{net}(Cl_B, t_3) = 0.27 - 0.31 = - 0.04$$

### **Class A**

$$\begin{aligned}
Score_R^+(Cl_A, t_3) &= \frac{|4,5,6,7,8, 13,14,15,16,17,18,19,20,46,47|^2}{|1, 2, 3, 4, 5, 6, 7, 8, 9, 10, 11, 13, 14, 15, 16, 17, 18, 19, 20, 21,23, 24, 25, 26,27,28, 29, 30, 31,33, 3|} \\
&= \frac{15^2}{(45 * 15)} = 0.33
\end{aligned}$$

$$\begin{aligned}
Score_R^-(Cl_A, t_3) &= \frac{|1,2,3,10,11,22,23,24,25,26,27,28,29,30,31,32,33,34,35,36,37,38,39,40,41,42,43,44,45,47|^2}{|1,2,3,10,11,22,23,24,25,26,27,28,29,30,31,32,33,34,35,36,37,38,39,40,41,42,43,44,45,47| * 33} \\
&= \frac{30^2}{(30 * 33)} = 0.91
\end{aligned}$$

$$Score_R^{net}(Cl_A, t_3) = 0.33 - 0.91 = - 0.58$$
